# Supplementary material
Source: PubMed Central journal article supplement (PMC4293226)
Supplement: NIHMS603797-supplement-supplement_1.pdf [file NIHMS603797-supplement-supplement_1.pdf]

SUPPLEMENTAL TABLE S1:

Grading criteria used for transfusion-related adverse events in PLADO, based on Common Toxicity Criteria for Adverse Events v3.0. All events on this list were to be reported if they occurred during or within 4 hours after the end of a transfusion, whether or not the event was judged to be caused by the transfusion.

| <i>EVENT</i>                                       | <b>GRADE</b>                               |                                                                                |                                                                                 |                                                                                                                                                                                |                                                                                                                          |
|----------------------------------------------------|--------------------------------------------|--------------------------------------------------------------------------------|---------------------------------------------------------------------------------|--------------------------------------------------------------------------------------------------------------------------------------------------------------------------------|--------------------------------------------------------------------------------------------------------------------------|
|                                                    | <b>0</b>                                   |                                                                                | <b>2</b>                                                                        | <b>3</b>                                                                                                                                                                       | <b>4</b>                                                                                                                 |
| <b>B5. Allergic reaction/<br/>Hypersensitivity</b> | <input type="checkbox"/> <sub>0</sub> None | <input type="checkbox"/> <sub>1</sub> transient flushing or rash               | <input type="checkbox"/> <sub>2</sub> rash, flushing, urticaria, dyspnea        | <input type="checkbox"/> <sub>3</sub> symptomatic bronchospasm, with or without urticaria; parenteral medication(s), indicated; allergy-related edema/ angioedema, hypotension | <input type="checkbox"/> <sub>4</sub> anaphylaxis                                                                        |
| <b>B6. Sinus bradycardia</b>                       | <input type="checkbox"/> <sub>0</sub> None | <input type="checkbox"/> <sub>1</sub> asymptomatic, intervention not indicated | <input type="checkbox"/> <sub>2</sub> non-urgent medical intervention indicated | <input type="checkbox"/> <sub>3</sub> symptomatic and incompletely controlled medically, or controlled with device (e.g. pacemaker)                                            | <input type="checkbox"/> <sub>4</sub> life-threatening (e.g. arrhythmia associated with CHF, hypotension syncope, shock) |
| <b>B7. Sinus tachycardia</b>                       | <input type="checkbox"/> <sub>0</sub> None | <input type="checkbox"/> <sub>1</sub> asymptomatic, intervention not indicated | <input type="checkbox"/> <sub>2</sub> non-urgent medical intervention indicated | <input type="checkbox"/> <sub>3</sub> symptomatic and incompletely controlled medically, or controlled with device (e.g. pacemaker)                                            | <input type="checkbox"/> <sub>4</sub> life-threatening (e.g. arrhythmia associated with CHF, hypotension syncope, shock) |

Table S1 continues on next page

Table S1, continued

| EVENT                                                                                                                | GRADE                                        |                                                                                                                                                                      |                                                                                                                                                                                    |                                                                                                                        |                                                                                                                        |
|----------------------------------------------------------------------------------------------------------------------|----------------------------------------------|----------------------------------------------------------------------------------------------------------------------------------------------------------------------|------------------------------------------------------------------------------------------------------------------------------------------------------------------------------------|------------------------------------------------------------------------------------------------------------------------|------------------------------------------------------------------------------------------------------------------------|
|                                                                                                                      | 0                                            |                                                                                                                                                                      | 2                                                                                                                                                                                  | 3                                                                                                                      | 4                                                                                                                      |
| B8. <b>Hypertension</b>                                                                                              | <input type="checkbox"/> <sub>0</sub> None   | <input type="checkbox"/> <sub>1</sub> asymptomatic, transient (<24hrs) increase by >20mmHg (diastolic) or to >150/100* if previously WNL; intervention not indicated | <input type="checkbox"/> <sub>2</sub> recurrent or persistent (>24hrs) symptomatic increase by >20mmHg (diastolic) or to >150/100* if previously WNL; monotherapy may be indicated | <input type="checkbox"/> <sub>3</sub> requiring more than one drug or more intensive therapy than previously           | <input type="checkbox"/> <sub>4</sub> Life-threatening consequences (e.g.hypertensive crisis)                          |
| <i>*Note: For pediatric patients, use age and sex appropriate normal values &gt; 95<sup>th</sup> percentile ULN.</i> |                                              |                                                                                                                                                                      |                                                                                                                                                                                    |                                                                                                                        |                                                                                                                        |
| B9. <b>Hypotension</b>                                                                                               | <input type="checkbox"/> <sub>0</sub> None   | <input type="checkbox"/> <sub>1</sub> changes, intervention not indicated                                                                                            | <input type="checkbox"/> <sub>2</sub> brief (<24hrs) fluid replacement or other therapy; no physiologic consequences                                                               | <input type="checkbox"/> <sub>3</sub> sustained (≥24hrs) therapy, resolves without persisting physiologic consequences | <input type="checkbox"/> <sub>4</sub> shock (acidemia; impairment of vital organ function)                             |
| B10. <b>Dyspnea</b><br>(shortness of breath)                                                                         | <input type="checkbox"/> <sub>0</sub> Normal | <input type="checkbox"/> <sub>1</sub> dyspnea on exertion, but can walk 1 flight of stairs without stopping                                                          | <input type="checkbox"/> <sub>2</sub> dyspnea on exertion but unable to walk 1 flight of stairs or 1 city block (0.1km) without stopping                                           | <input type="checkbox"/> <sub>3</sub> dyspnea with ADL                                                                 | <input type="checkbox"/> <sub>4</sub> dyspnea at rest; intubation/ventilator indicated                                 |
| B11. <b>Hypoxia</b>                                                                                                  | <input type="checkbox"/> <sub>0</sub> Normal | —                                                                                                                                                                    | <input type="checkbox"/> <sub>2</sub> decreased O <sub>2</sub> saturation with exercise (e.g. pulse oximeter<88%); intermittent supplemental oxygen                                | <input type="checkbox"/> <sub>3</sub> decreased O <sub>2</sub> saturation at rest; continuous oxygen indicated         | <input type="checkbox"/> <sub>4</sub> life-threatening; intubation or ventilation indicated                            |
| B12. <b>Wheezing</b>                                                                                                 | <input type="checkbox"/> <sub>0</sub> None   | <input type="checkbox"/> <sub>1</sub> asymptomatic                                                                                                                   | <input type="checkbox"/> <sub>2</sub> symptomatic not interfering with function                                                                                                    | <input type="checkbox"/> <sub>3</sub> symptomatic interfering with function                                            | <input type="checkbox"/> <sub>4</sub> life-threatening                                                                 |
| B13. <b>Cough</b>                                                                                                    | <input type="checkbox"/> <sub>0</sub> None   | <input type="checkbox"/> <sub>1</sub> symptomatic, non-narcotic medication only indicated                                                                            | <input type="checkbox"/> <sub>2</sub> symptomatic and narcotic medication indicated                                                                                                | <input type="checkbox"/> <sub>3</sub> Operative intervention indicated                                                 | <input type="checkbox"/> <sub>4</sub> life-threatening (e.g. hemodynamic instability or ventilatory support indicated) |

Table S1 continues on next page

Table S1, continued

| EVENT                                                                       | GRADE                                      |                                                                                                                                    |                                                                                                                               |                                                                                                                                                                    |                                                                                                                              |
|-----------------------------------------------------------------------------|--------------------------------------------|------------------------------------------------------------------------------------------------------------------------------------|-------------------------------------------------------------------------------------------------------------------------------|--------------------------------------------------------------------------------------------------------------------------------------------------------------------|------------------------------------------------------------------------------------------------------------------------------|
|                                                                             | 0                                          |                                                                                                                                    | 2                                                                                                                             | 3                                                                                                                                                                  | 4                                                                                                                            |
| B14. <b>Hemolysis</b>                                                       | <input type="checkbox"/> <sub>0</sub> None | <input type="checkbox"/> <sub>1</sub> laboratory evidence of hemolysis only (direct antiglobulin test [DAT, Coombs'] schistocytes) | <input type="checkbox"/> <sub>2</sub> evidence of red cell destruction and $\geq 2$ gm decrease in hemoglobin, no transfusion | <input type="checkbox"/> <sub>3</sub> transfusion or medical intervention (e.g. steroids) indicated                                                                | <input type="checkbox"/> <sub>4</sub> catastrophic consequences of hemolysis (e.g. renal failure, hypotension, bronchospasm) |
| B15. <b>Rigors, chills</b>                                                  | <input type="checkbox"/> <sub>0</sub> None | <input type="checkbox"/> <sub>1</sub> mild requiring symptomatic treatment (e.g., blanket) or non-narcotic medication              | <input type="checkbox"/> <sub>2</sub> severe and/or prolonged, requiring narcotic medication                                  | <input type="checkbox"/> <sub>3</sub> not responsive to narcotic medication                                                                                        | —                                                                                                                            |
| B16. <b>Fever</b>                                                           | <input type="checkbox"/> <sub>0</sub> None | <input type="checkbox"/> <sub>1</sub> 38.0 – 39.0°C (100.4 – 102.2°F)                                                              | <input type="checkbox"/> <sub>2</sub> >39.0 – 40.0°C (>102.2 – 104.0°F)                                                       | <input type="checkbox"/> <sub>3</sub> >40.0°C (>104.0°F) for $\leq 24$ hours                                                                                       | <input type="checkbox"/> <sub>4</sub> >40.0°C (>104.0°F) for >24 hours                                                       |
| <i>Note: The temperature measurements listed above are oral or tympanic</i> |                                            |                                                                                                                                    |                                                                                                                               |                                                                                                                                                                    |                                                                                                                              |
| B17. <b>Infection</b>                                                       | <input type="checkbox"/> <sub>0</sub> None | —                                                                                                                                  | <input type="checkbox"/> <sub>2</sub> localized, local intervention indicated                                                 | <input type="checkbox"/> <sub>3</sub> IV antibiotic, antifungal, or antiviral intervention indicated, interventional radiology or operative intervention indicated | <input type="checkbox"/> <sub>4</sub> life-threatening consequences (e.g. septic shock, hypotension, acidosis, necrosis)     |
